# Supplementary material for: Alcohol mediated degenerate chain transfer controlled cationic polymerisation of para-alkoxystyrene
Source: Royal Society of Chemistry journal article supplement (doi:10.1039/c9py00480g), 2019-01-01
Supplement: c9py00480g1.pdf [file c9py00480g1.pdf]

## Supporting information

### Alcohol mediated degenerate chain transfer controlled cationic polymerisation of *para*-alkoxystyrene

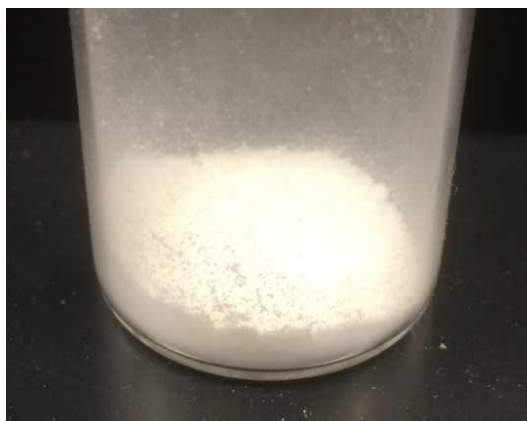

Alka Prasher,<sup>a</sup> Huamin Hu,<sup>a</sup> Joji Tanaka,<sup>a</sup> David A. Nicewicz,<sup>a</sup> Wei You<sup>a\*</sup>

<sup>a</sup>Department of Chemistry, University of North Carolina at Chapel Hill, Chapel Hill, North Carolina 27599-3290, United States.

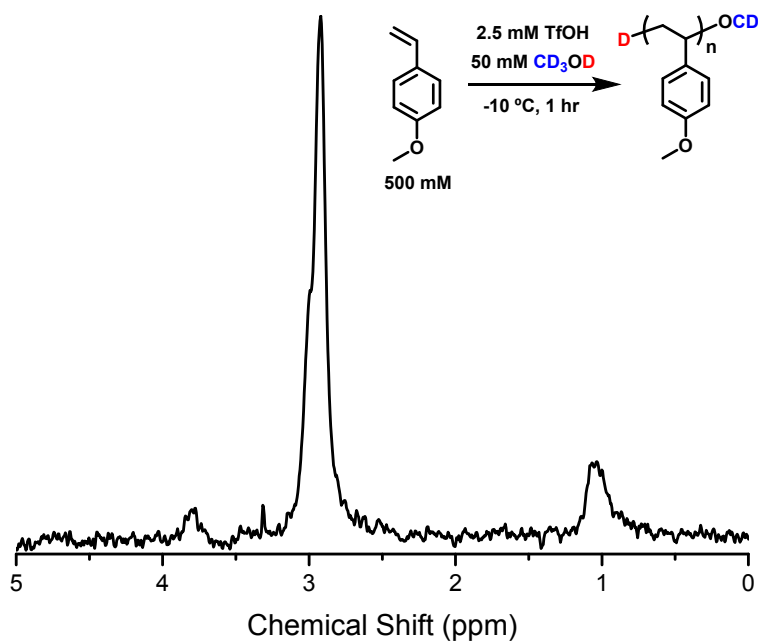

**Figure S1:** D-NMR spectrum in Dichloromethane

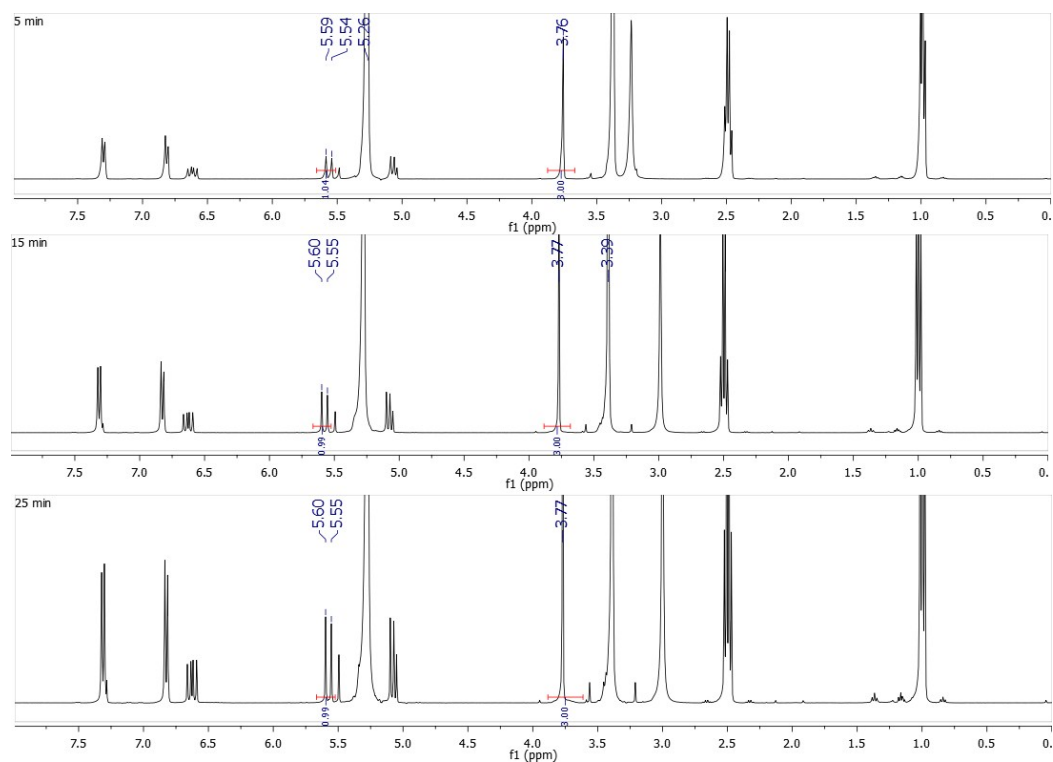

**Figure S2:** <sup>1</sup>H-NMR of pMOS polymerisation (5-25 mins), conversion was obtained by integrating the *-CH-* vinylic proton at 5.57 ppm and using the phenyl-methoxy *-OCH<sub>3</sub>* at 3.77 as internal reference.

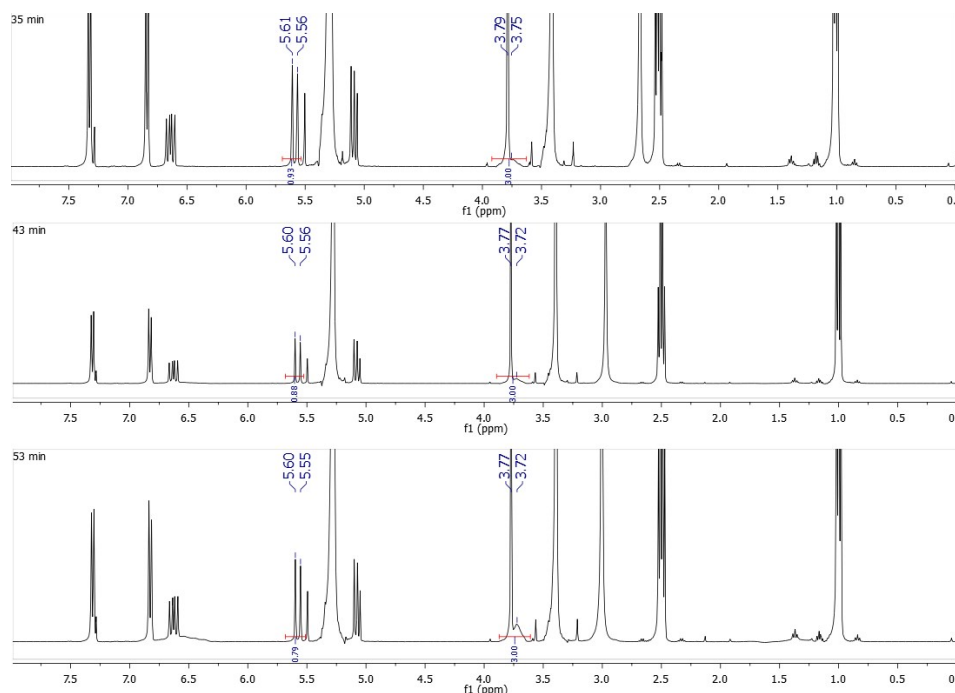

**Figure S3:**  $^1\text{H-NMR}$  of pMOS polymerisation (35-53 mins), conversion was obtained by integrating the  $-\text{CH}-$  vinylic proton at 5.57 ppm and using the phenyl-meoxy  $-\text{OCH}_3$  at 3.77 as internal reference.

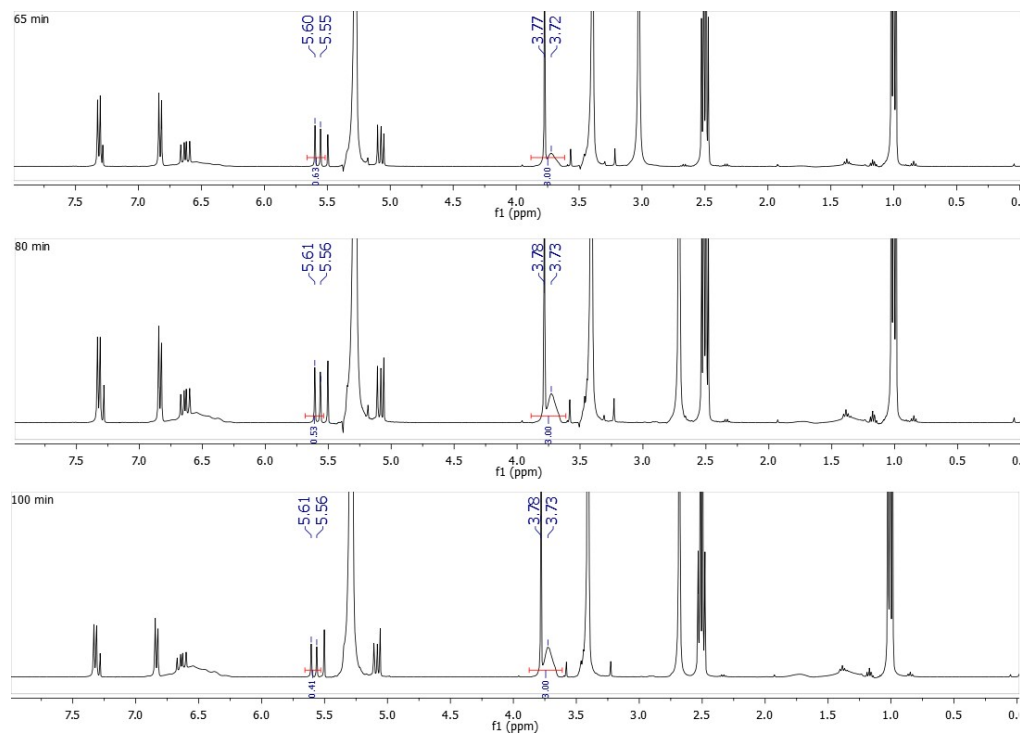

**Figure S4:**  $^1\text{H-NMR}$  of pMOS polymerisation (65-100 mins), conversion was obtained by integrating the  $-\text{CH}-$  vinylic proton at 5.57 ppm and using the phenyl-meoxy  $-\text{OCH}_3$  at 3.77 as internal reference.

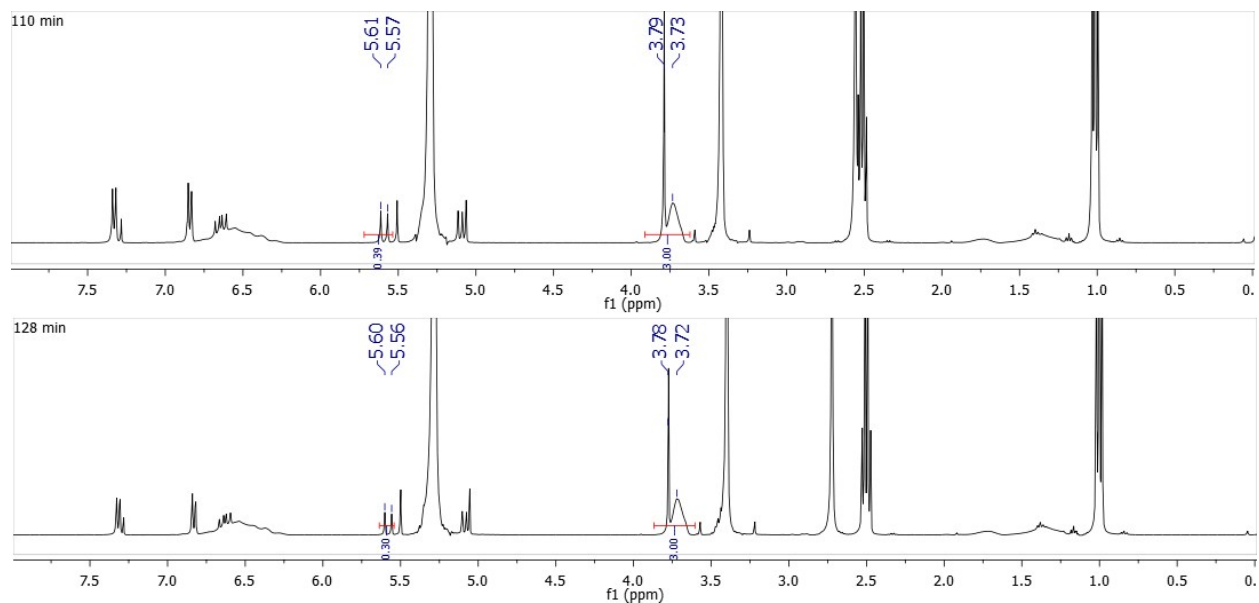

**Figure S5:**  $^1\text{H-NMR}$  of pMOS polymerisation (110-128 mins), conversion was obtained by integrating the  $-\text{CH}-$  vinylic proton at 5.57 ppm and using the phenyl-meoxy  $-\text{OCH}_3$  at 3.77 as internal reference.

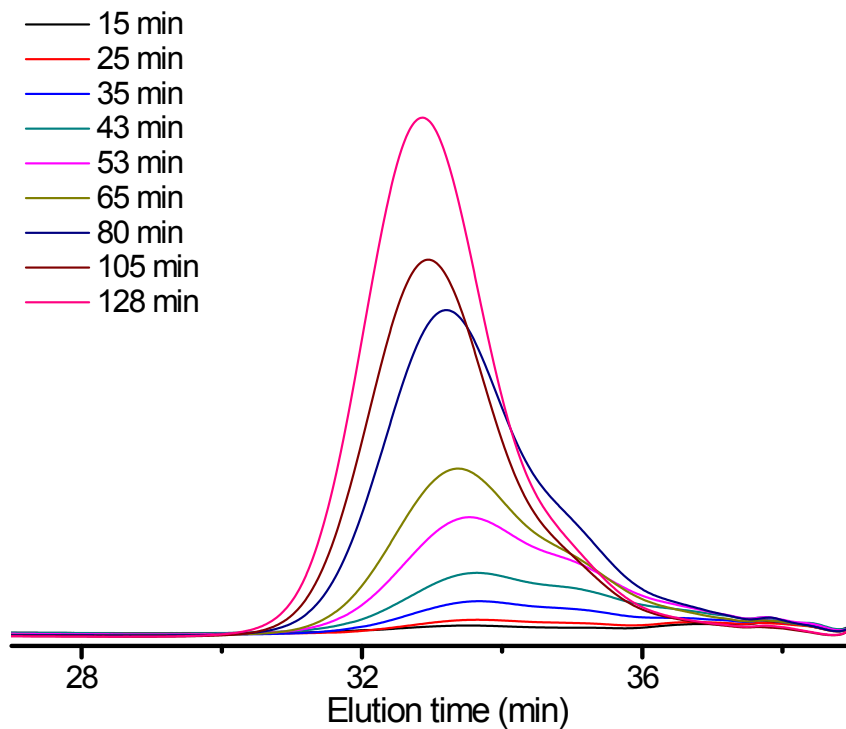

**Figure S6:** SEC (dRI, THF) graph of pMOS polymerisation (5-128 mins).

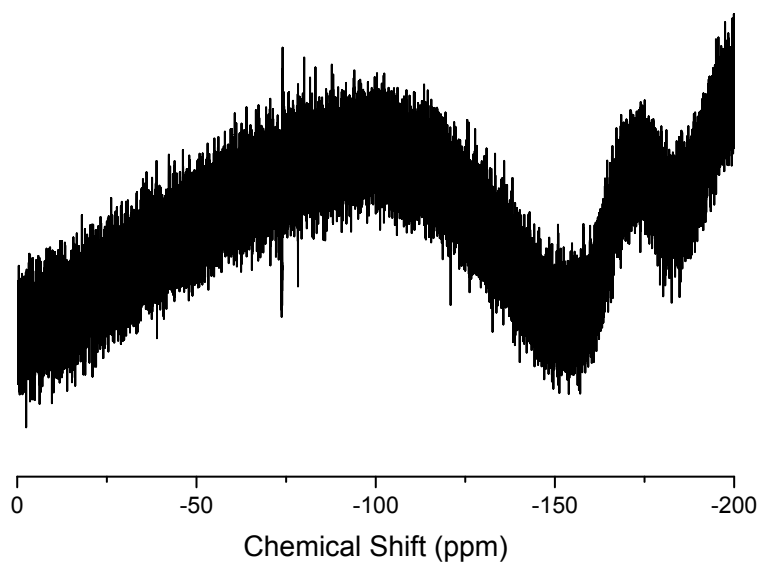

**Figure S7:**  $^{19}\text{F}$ -NMR of cationic polymerisation in presence of trifluoroethanol (entry 5, table 2).

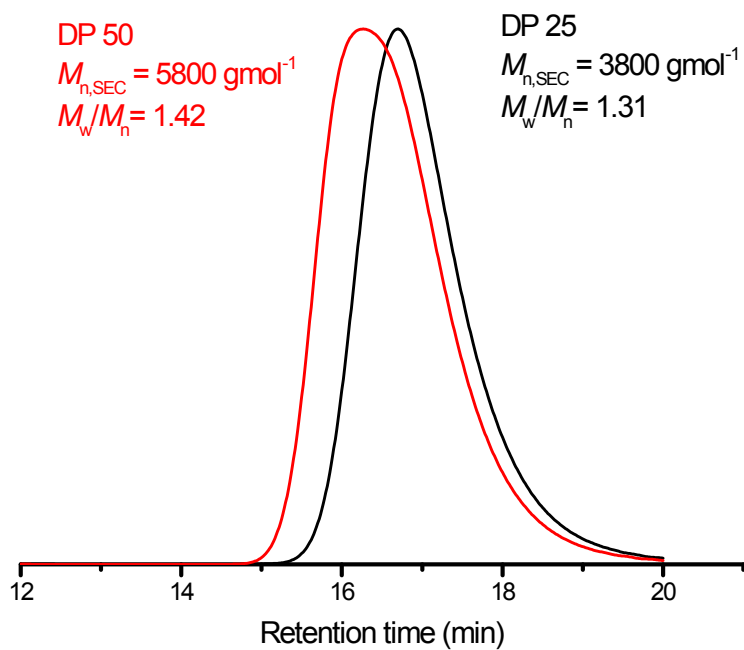

**Figure S8:** SEC (dRI, THF) chromatogram of chain extension of Poly(pMOS) with pMOS.

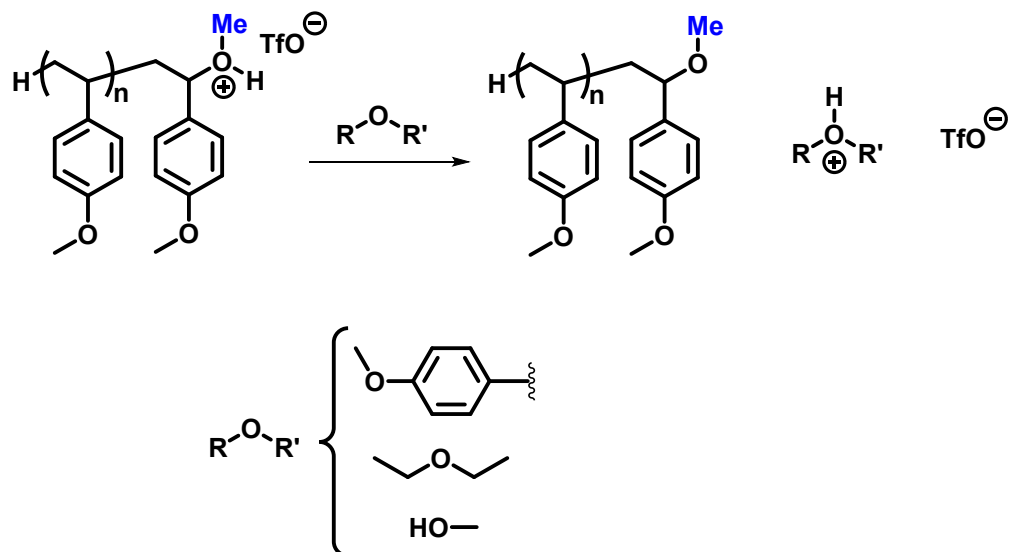

**Scheme S1:** Proton exchange of methanol derived proton on  $\omega$ -end methoxy group with free divalent oxygen on monomer/polymeric *p*-MOS side chains, diethyl ether or free alcohol.
